# Supplementary material for: Association between different types of preoperative anemia and tumor characteristics, systemic inflammation, and survival in colorectal cancer
Source: PeerJ. 2023 Dec 21;11:e16293. doi: 10.7717/peerj.16293 (PMC10749087; doi:10.7717/peerj.16293)
Supplement: Data S1 [file peerj-11-16293-s001.xls]

## Sheet: No anemia group
Patiennt	Admission number	Gender		Age		Weight loss	CEA	CA199	CA724	CA242	CA125	Tumor location	Vascular tumor thrombus	Nerve invasion	TNM stage	Distant metastasis	Lymph node metastasis	mGPS score
1	19017	M	48	47	23.23	3.23	-	-	-	-	+	Colon	Yes	4	I	No	No	1
2	19018	F	46	45	23.35	3.35	-	-	-	-	-	Rectum	No	5	II	Yes	Yes	2
3	19019	M	48	47	19.97	7.1	-	-	+	-	-	Colon	Yes	4	III	No	Yes	2
4	19020	M	49	48	20.24	0.24	-	-	-	+	+	Rectum	No	5	I	Yes	No	2
5	19021	M	54	53	20.88	0.88	-	+	+	-	+	Colon	No	4	I	Yes	No	1
6	19022	F	47	46	19.99	0.9	-	-	+	-	-	Rectum	Yes	4	I	No	No	1
7	19023	M	57	56	20.71	0.71	-	-	-	-	-	Colon	No	5	IV	No	No	1
8	19024	M	59	58	22.94	2.94	-	-	-	+	-	Rectum	No	4	III	No	No	1
9	19025	M	43	42	19.48	6.3	-	-	-	-	-	Colon	Yes	5	II	No	Yes	0
10	19026	M	49	79	22.21	2.21	-	+	-	-	-	Colon	No	4	II	No	Yes	0
11	19027	F	48	47	24.51	4.51	-	-	+	-	-	Colon	Yes	5	II	No	No	1
12	19028	M	61	60	25.28	5.28	+	+	-	-	-	Rectum	No	4	IV	Yes	No	0
13	19029	M	57	56	20.54	0.54	+	+	-	+	-	Colon	No	5	IV	Yes	No	1
14	19030	F	47	46	22.13	2.13	+	+	-	+	+	Colon	Yes	5	IV	Yes	No	0
15	19031	M	55	54	23.69	3.69	+	-	-	+	+	Colon	No	4	I	No	Yes	0
16	19032	M	48	47	25.05	5.05	-	-	+	+	+	Colon	No	2	I	No	Yes	0
17	19033	F	56	55	19.52	6.4	-	-	+	-	+	Rectum	No	4	I	Yes	Yes	0
18	19034	F	64	63	21.63	1.63	-	-	-	-	+	Colon	Yes	5	I	No	Yes	0
19	19035	M	45	44	21.7	1.7	-	-	-	-	+	Rectum	No	4	I	No	Yes	1
20	19036	M	49	48	25.07	5.07	-	-	-	-	-	Colon	No	2	I	Yes	Yes	1
21	19037	M	35	72	19.78	5.7	-	-	+	+	-	Colon	No	5	IV	Yes	Yes	2
22	19038	M	52	51	27.03	7.03	-	-	+	+	-	Colon	No	4	I	No	No	1
23	19039	M	49	48	22.54	2.54	-	-	+	-	-	Colon	Yes	4	I	No	No	2
24	19040	M	47	67	22.94	2.94	-	-	+	-	-	Rectum	No	4	IV	No	No	2
25	19041	M	44	43	19.53	6.4	-	-	+	-	-	Colon	No	5	IV	Yes	No	2
26	19042	M	35	34	19.37	6.3	-	-	+	-	-	Colon	Yes	4	II	No	Yes	2
27	19043	M	63	62	23.62	3.62	-	-	-	-	+	Colon	Yes	5	II	No	Yes	1
28	19044	M	56	55	20.98	0.98	-	-	-	-	-	Rectum	Yes	5	II	No	No	0
29	19045	F	55	54	19.02	8.1	-	-	+	+	-	Colon	No	5	II	Yes	No	0
30	19046	M	49	48	22.11	2.11	-	-	-	-	-	Colon	No	5	IV	Yes	No	0
31	19047	M	51	50	22.86	2.86	-	-	-	-	+	Rectum	Yes	4	IV	Yes	No	2
32	19048	M	57	56	21.79	1.79	+	-	-	+	-	Colon	No	4	IV	No	No	1
33	19049	F	37	36	22.41	2.41	-	-	-	+	-	Colon	No	5	IV	No	No	1
34	19050	F	52	51	19.98	5.78	-	-	-	-	-	Colon	No	4	I	Yes	Yes	0
35	19051	M	55	54	21.24	1.24	-	-	-	-	-	Rectum	No	4	I	No	Yes	0
36	19052	M	48	47	21.48	1.48	-	+	-	-	+	Colon	Yes	5	IV	No	No	0
37	19053	M	47	67	26.09	6.09	-	+	-	-	-	Colon	Yes	5	IV	No	No	1
38	19054	M	49	48	23.63	3.63	+	-	+	-	-	Colon	Yes	5	I	Yes	No	1
39	19055	F	51	50	21.99	1.99	-	-	-	+	-	Colon	No	4	I	Yes	No	2
40	19056	M	47	46	20.95	0.95	-	-	-	+	-	Rectum	No	4	I	No	No	1
41	19057	M	58	65	22.55	2.55	-	-	+	+	+	Colon	No	5	I	No	No	0
42	19058	M	61	60	20.64	0.64	-	-	-	-	+	Colon	Yes	4	I	No	No	2
43	19059	F	49	48	24.1	4.1	-	+	-	-	-	Rectum	No	5	I	No	No	1
44	19060	M	58	57	23.93	3.93	-	+	-	-	-	Colon	No	4	IV	No	Yes	0
45	19061	F	47	70	26.38	6.38	-	-	-	-	-	Rectum	No	4	IV	No	Yes	0
46	19062	F	52	51	25.26	5.26	-	-	-	+	+	Colon	No	4	I	Yes	Yes	1
47	19063	F	53	52	25.17	5.17	-	-	-	-	-	Rectum	Yes	5	IV	Yes	No	2
48	19064	M	46	45	26.43	6.43	-	-	-	-	-	Rectum	No	4	IV	No	No	2
49	19065	M	49	48	27.72	7.72	-	-	+	-	+	Colon	No	5	II	No	No	1
50	19066	F	54	53	17.38	6.2	-	-	+	+	-	Rectum	Yes	4	II	No	Yes	0
51	19067	M	52	74	20.76	0.76	+	+	-	-	+	Colon	No	4	II	No	Yes	0
52	19068	F	63	62	22.81	2.81	+	+	-	-	-	Rectum	No	4	IV	No	No	1

## Sheet: Microcytic anemia group
Patiennt	Admission number	Gender		Age		Weight loss	CEA	CA199	CA724	CA242	CA125	Tumor location	Vascular tumor thrombus	Nerve invasion	TNM stage	Distant metastasis	Lymph node metastasis	mGPS score
1	19078	M	48	47	23.23	3.23	-	-	+	-	+	Colon	Yes	4	I	No	No	1
2	19078	F	46	58	23.35	3.35	-	-	-	-	-	Rectum	No	5	II	No	Yes	2
3	19078	M	48	47	19.97	7.1	+	-	+	-	-	Colon	Yes	4	III	No	Yes	2
4	19078	F	49	73	20.24	0.24	-	-	-	-	-	Rectum	No	5	I	Yes	No	2
5	19078	F	54	53	20.88	0.88	-	-	+	-	+	Colon	No	4	I	No	No	1
6	19078	F	47	46	19.99	0.9	+	-	+	-	-	Rectum	Yes	4	IV	No	No	1
7	19078	M	57	56	20.71	0.71	-	-	-	-	-	Colon	No	5	IV	No	No	1
8	19078	F	59	58	22.94	2.94	-	-	-	+	-	Colon	No	4	III	No	No	1
9	19078	M	43	42	19.48	5.7	-	-	-	-	-	Colon	No	5	II	No	No	0
10	19078	F	49	79	22.21	2.21	-	+	-	-	-	Colon	No	4	IV	No	No	0
11	19078	F	48	47	24.51	4.51	-	-	+	-	-	Colon	No	5	IV	No	No	1
12	19078	F	61	60	25.28	5.28	+	-	-	-	-	Rectum	No	4	IV	Yes	No	1
13	19078	F	57	45	20.54	0.54	-	-	-	+	-	Colon	No	5	IV	No	No	1
14	19078	F	47	46	22.13	2.13	-	-	-	-	+	Colon	No	5	IV	No	No	1
15	19078	F	55	70	23.69	3.69	+	-	-	+	-	Colon	No	4	I	No	Yes	1

## Sheet: Normocytic anemia group
Patiennt	Admission number	Gender		Age		Weight loss	CEA	CA199	CA724	CA242	CA125	Tumor location	Vascular tumor thrombus	Nerve invasion	TNM stage	Distant metastasis	Lymph node metastasis	mGPS score
1	19469	M	48	69	23.23	3.23	-	-	-	-	+	Colon	Yes	4	I	No	No	1
2	19469	F	46	68	23.35	3.35	-	-	-	-	-	Rectum	No	5	II	Yes	Yes	2
3	19469	M	48	47	19.97	5.88	+	-	+	-	-	Colon	Yes	4	III	No	Yes	2
4	19469	F	49	48	20.24	0.24	-	-	-	+	+	Rectum	No	5	I	Yes	No	2
5	19469	M	54	53	20.88	0.88	-	+	+	-	+	Colon	No	4	I	Yes	No	1
6	19469	F	47	70	19.99	8.9	-	-	+	-	-	Rectum	Yes	2	I	No	Yes	1
7	19469	M	57	56	20.71	0.71	-	-	-	-	-	Colon	No	5	IV	Yes	No	1
8	19469	F	59	58	22.94	2.94	-	-	+	+	-	Rectum	No	4	III	No	No	1
9	19469	M	43	42	19.48	6.3	-	-	-	-	-	Colon	Yes	5	II	No	Yes	0
10	19469	M	49	79	22.21	2.21	-	+	-	-	-	Colon	No	4	II	No	Yes	0
11	19469	F	48	47	24.51	4.51	-	-	+	-	-	Colon	Yes	5	II	No	No	1
12	19469	M	61	60	25.28	5.28	+	+	-	-	-	Rectum	No	4	IV	Yes	No	0
13	19469	M	57	68	20.54	8.95	+	+	-	+	-	Colon	No	5	IV	Yes	No	1
14	19469	F	47	46	22.13	2.13	+	+	-	+	+	Colon	Yes	5	IV	Yes	No	0
15	19469	M	55	64	23.69	3.69	+	-	-	+	+	Colon	No	4	I	No	Yes	1
16	19469	M	48	47	25.05	5.05	-	-	+	+	+	Colon	No	2	I	No	Yes	0
17	19469	F	56	75	19.52	6.4	-	-	+	-	+	Rectum	No	4	II	Yes	Yes	0
18	19469	F	64	63	21.63	1.63	-	-	-	-	+	Colon	Yes	5	I	No	No	0
19	19469	M	45	73	21.7	9.06	-	-	-	-	+	Rectum	No	4	I	No	No	1
20	19469	M	49	48	25.07	5.07	-	-	-	-	-	Colon	No	2	I	Yes	Yes	1
21	19469	M	35	72	19.78	5.7	+	-	+	-	-	Colon	No	5	IV	Yes	Yes	2
22	19469	M	52	51	27.03	3	+	-	+	-	-	Colon	No	4	I	No	No	1
23	19469	F	49	78	22.54	2.54	-	+	+	-	-	Colon	Yes	4	I	No	No	0
24	19469	F	47	67	22.94	2.94	-	-	-	-	-	Rectum	No	4	IV	No	No	2
25	19469	F	44	43	19.53	6.4	-	-	-	-	-	Colon	No	5	IV	Yes	No	1
26	19469	M	35	75	19.37	6.3	-	-	+	-	-	Colon	Yes	2	II	No	Yes	2
27	19469	M	63	62	23.62	3.62	-	-	-	-	+	Colon	Yes	5	III	No	Yes	1
28	19469	M	56	55	20.98	5.9	-	-	-	-	-	Rectum	Yes	5	II	No	No	0
29	19469	F	55	77	19.02	8.1	-	-	+	-	-	Colon	No	5	II	Yes	No	0

## Sheet: Data for prognostic analysis
Group	Prognosis（Good=0;Poor=1）	Months
1	0	16.34
1	0	20.88
1	1	19.52
1	1	16.63
1	1	14.95
1	1	18.66
1	1	18.71
1	1	18.05
1	1	19.32
1	0	15.31
1	0	18.96
1	0	16.66
1	0	16.02
1	1	17.27
1	1	18.59
1	1	20.21
1	1	20.4
1	0	21.01
1	1	17.18
1	0	19.88
1	0	12.51
1	1	14.26
1	1	21.37
1	1	19.28
1	0	20.81
1	1	16.14
1	0	17.25
1	0	18.38
1	1	19.45
1	0	16.43
1	0	13.48
1	1	17.59
1	0	21.62
1	0	16.08
1	0	17.64
1	1	15.39
1	0	16.16
1	0	18.78
1	1	17.9
1	0	13.46
1	0	15.8
1	1	20.69
1	0	15.86
1	0	22.3
1	1	13.79
1	0	18.33
1	0	16.33
1	1	21.87
1	0	20.74
1	0	16.26
1	0	17.72
1	1	17.79
2	0	17.96
2	0	13.89
2	0	14.04
2	1	18.29
2	0	15.12
2	0	19.17
2	0	18.19
2	1	17.39
2	0	19.6
2	0	16.98
2	1	14.43
2	0	18.23
2	0	21.13
2	0	15.02
3	1	17.16
3	0	14.73
3	1	18.19
3	0	19.3
3	1	21.66
3	0	21.63
3	0	20.05
3	1	19.16
3	0	19.65
3	1	18.44
3	0	17.14
3	0	16.96
3	1	14.82
3	0	14.01
3	1	16.8
3	0	14.11
3	0	18.05
3	0	20.36
3	1	18.45
3	0	20.49
3	0	16
3	1	19.83
3	0	20.05
3	0	21.7
3	1	14.95
3	0	22.85
3	1	21.45
3	0	17.99
3	1	20.63
